# Supplementary material for: Synthesis and Evaluation of Dodecaboranethiol Containing Kojic Acid (KA-BSH) as a Novel Agent for Boron Neutron Capture Therapy
Source: MDPI journal article supplement (doi:10.3390/cells9061551), 2020-06-25
Supplement: s1 [file s1]

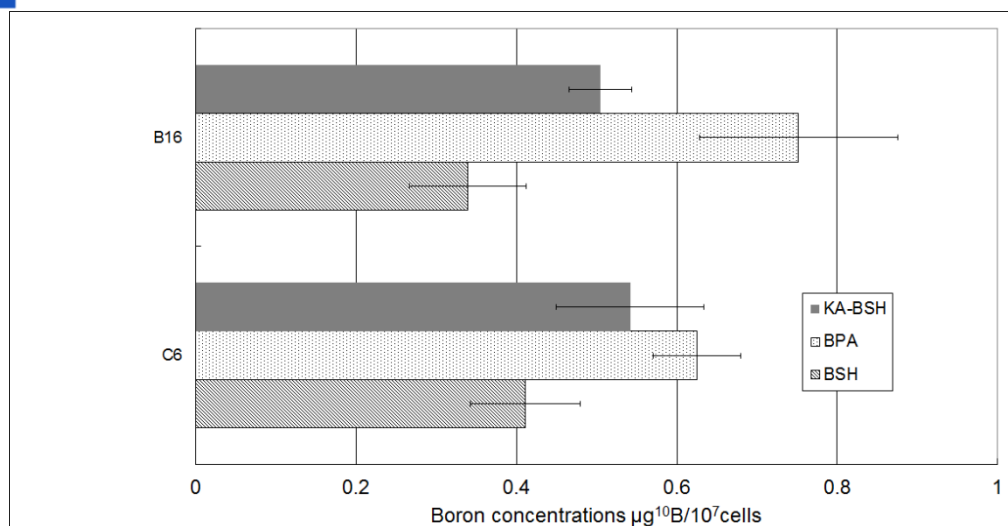

1 **Figure S1.** The boron concentrations of B16 mouse melanoma cells and C6 rat glioma cells. <sup>10</sup>B concentration of  
 2 F98 rat glioma cells 24 h after incubation in DMEM, including 1 mM of each boron compound.

3 **Table S1.** Boron concentrations in F98 glioma bearing rats

| Agent <sup>a</sup><br>/ Route | dose<br>(mg <sup>10</sup> B/kg) | Time<br>(h) | n <sup>b</sup> | <sup>10</sup> B concentrations ± SD (µg <sup>10</sup> B/g) <sup>c</sup> |                      |                        |              | Ratios <sup>d</sup> |       |
|-------------------------------|---------------------------------|-------------|----------------|-------------------------------------------------------------------------|----------------------|------------------------|--------------|---------------------|-------|
|                               |                                 |             |                | Blood                                                                   | Ipsilateral<br>brain | Contralateral<br>brain | Tumor        | T/Bl                | T/Br  |
| KA-BSH<br>/ iv                | 10                              | 1           | 5              | 4.71 ± 1.09                                                             | 0.29 ± 0.07          | 0.24 ± 0.06            | 1.42 ± 0.28  | 0.31                | 5.99  |
|                               |                                 | 3           | 3              | 1.26 ± 0.22                                                             | 0.10 ± 0.04          | 0.09 ± 0.01            | 0.85 ± 0.30  | 0.69                | 9.52  |
|                               | 20                              | 1           | 5              | 8.76 ± 1.24                                                             | 0.31 ± 0.10          | 0.24 ± 0.09            | 2.96 ± 0.74  | 0.34                | 13.21 |
|                               |                                 | 3           | 4              | 1.54 ± 0.65                                                             | 0.14 ± 0.07          | 0.09 ± 0.05            | 1.47 ± 0.17  | 1.12                | 21.07 |
|                               | 30                              | 1           | 4              | 14.21 ± 3.17                                                            | 0.63 ± 0.09          | 0.45 ± 0.08            | 6.65 ± 0.25  | 0.49                | 15.27 |
|                               |                                 | 3           | 4              | 2.35 ± 1.37                                                             | 0.35 ± 0.39          | 0.14 ± 0.06            | 2.91 ± 0.34  | 1.58                | 23.09 |
| BSH<br>/ iv                   | 30                              | 1           | 4              | 19.17 ± 3.28                                                            | 0.44 ± 0.08          | 0.32 ± 0.05            | 5.49 ± 0.25  | 0.29                | 17.61 |
|                               |                                 | 3           | 4              | 5.16 ± 1.89                                                             | 0.36 ± 0.05          | 0.24 ± 0.04            | 3.01 ± 0.95  | 0.61                | 12.71 |
| BPA<br>/ iv                   | 10                              | 1           | 6              | 6.65 ± 1.76                                                             | 2.94 ± 0.67          | 3.19 ± 0.67            | 13.54 ± 4.82 | 2.00                | 4.21  |
|                               |                                 | 3           | 4              | 4.41 ± 1.21                                                             | 3.29 ± 0.44          | 2.95 ± 0.72            | 11.05 ± 2.58 | 2.53                | 3.83  |

4 a; KA-BSH, BSH or BPA was administered by intravenous injections, administered to Fischer rats bearing  
 5 intracranial implants of the F98 rat glioma. Animals were euthanized at 1 and 3 h following the injection and  
 6 tissues were removed for <sup>10</sup>B determinations. b; n is the number of animals per group. c; <sup>10</sup>B concentrations were  
 7 determined by ICP-AES. The mean <sup>10</sup>B values (µg <sup>10</sup>B/g weight of tissue) ± the standard deviation are shown for  
 8 groups of 3–6 rats. d; T/Bl indicates the tumor to blood ratio. T/Br indicates the tumor to normal brain  
 9 (contralateral brain) ratio.

10 **Table S2.** Survival times of F98 glioma bearing rats following KA-BSH

| Agent/Route            |                | Survival Time |       |        |         | %ILS <sup>c</sup> |
|------------------------|----------------|---------------|-------|--------|---------|-------------------|
| Group                  | n <sup>b</sup> | Mean ± SD     |       | Median | Range   | Median            |
| KA-BSH/iv <sup>a</sup> | 5              | 35.4          | ± 8.0 | 36.0   | 32 – 38 | 22.0              |
| Irradiated Controls    | 6              | 30.2          | ± 2.2 | 30.5   | 26 – 32 | 3.4               |
| Untreated Controls     | 4              | 28.5          | ± 3.1 | 29.5   | 24 – 31 | -                 |

11 a; A total of 10 mg 10B/kg of KA-BSH was administered by intravenous injection. BNCT was initiated 1 hour  
 12 after the intravenous administration of KA-BSH. B; n is the number of animals per group. c; Percent increase life  
 13 span (%ILS) was defined relative to the median survival times of untreated controls.
